# Supplementary material
Source: Elsevier journal article supplement (https://rcastoragev2.blob.core.windows.net/4d4c88e174bbc963f2ee837889a7dbfe/mmc1.pdf)
Supplement: mmc1 [file mmc1.pdf]

Cell, Volume 179

## **Supplemental Information**

### **Conversion of *Escherichia coli* to Generate All Biomass Carbon from CO<sub>2</sub>**

**Shmuel Gleizer, Roei Ben-Nissan, Yinon M. Bar-On, Niv Antonovsky, Elad Noor, Yehudit Zohar, Ghil Jona, Eyal Krieger, Melina Shamshoum, Arren Bar-Even, and Ron Milo**

**Table S1. <sup>13</sup>C-labeled fractions of protein-bound amino acids and sugar-phosphates following isotopic labeling experiments with <sup>13</sup>CO<sub>2</sub> + <sup>12</sup>C-formate, related to Figure 3.**

The presented values are mean (±S.D.). \*Values that after normalization slightly exceeded 100% were written as 100%.

| Metabolite      | Isolated Clone |             |         | Mixed Population |             |         |
|-----------------|----------------|-------------|---------|------------------|-------------|---------|
|                 | measured       | normalized  | repeats | measured         | normalized  | repeats |
| Ser             | 89.2 ± 2.6%    | 99.9 ± 3.1% | n=5     | 92.1 ± 2.7%      | 100* ± 3.5% | n=2     |
| His             | 86.5 ± 1.3%    | 97.0 ± 3.9% | n=5     | 89.0 ± 3.3%      | 98.0 ± 3.4% | n=2     |
| Val             | 89.6 ± 1.4%    | 100* ± 3.8% | n=5     | 92.4 ± 3.3%      | 100* ± 3.5% | n=2     |
| Thr             | 88.5 ± 1.5%    | 99.3 ± 4.2% | n=5     | 90.2 ± 2.8%      | 99.3 ± 3.5% | n=2     |
| Pro             | 85.9 ± 4.1%    | 96.3 ± 6.6% | n=5     | 87.2 ± 2.4%      | 96.0 ± 3.3% | n=2     |
| Leu             | 86.0 ± 3.5%    | 96.4 ± 5.9% | n=5     | 87.5 ± 2.3%      | 96.3 ± 3.4% | n=2     |
| Ile             | 87.9 ± 1.9%    | 98.5 ± 4.0% | n=5     | 89.8 ± 2.8%      | 98.8 ± 3.4% | n=2     |
| Arg             | 86.0 ± 3.0%    | 96.4 ± 5.4% | n=5     | 87.1 ± 2.5%      | 95.9 ± 3.3% | n=2     |
| Glu             | 84.7 ± 3.6%    | 95.0 ± 6.4% | n=5     | 86.0 ± 2.2%      | 94.6 ± 3.3% | n=2     |
| S7P             | 84.8 ± 1.1%    | 95.1 ± 4.3% | n=5     | 82.7 ± 4.1%      | 91.1 ± 3.1% | n=2     |
| P5P             | 83.9 ± 1.5%    | 94.1 ± 4.7% | n=5     | 80.7 ± 5.7%      | 88.9 ± 3.1% | n=2     |
| H6P             | 83.5 ± 3.8%    | 93.7 ± 6.1% | n=5     | 81.8 ± 2.2%      | 90.0 ± 3.1% | n=2     |
| AMP/ADP/<br>ATP | 77.2 ± 1.4%    | 86.6 ± 4.3% | n=5     | 74.0 ± 1.8%      | 84.1 ± 3.2% | n=2     |
| UMP/UDP/<br>UTP | 87.1 ± 1.2%    | 97.6 ± 4.5% | n=5     | 84.2 ± 4.8%      | 95.7 ± 6.1% | n=2     |

**Table S2.  $^{13}\text{C}$ -labeled fractions of protein-bound amino acids and sugar-phosphates following isotopic labeling experiment with  $^{13}\text{CO}_2$  +  $^{13}\text{C}$ -formate, related to Figure 3.**  
The presented values are mean ( $\pm$ S.D.).

| Metabolite      | Isolated Clone             |         | Mixed Population           |         |
|-----------------|----------------------------|---------|----------------------------|---------|
|                 | measured % $^{13}\text{C}$ | repeats | measured % $^{13}\text{C}$ | repeats |
| Ser             | 99.3 $\pm$ 0.1%            | n=3     | 96.8 $\pm$ 1.4%            | -       |
| His             | 98.9 $\pm$ 0.2%            | n=3     | 95.8 $\pm$ 1.6%            | n=3     |
| Val             | 99.2 $\pm$ 0.03%           | n=3     | 97.5 $\pm$ 0.9%            | n=3     |
| Thr             | 98.5 $\pm$ 0.7%            | n=3     | 93.6 $\pm$ 3.1%            | n=3     |
| Pro             | 97.7 $\pm$ 0.3%            | n=3     | 92.4 $\pm$ 2.7%            | n=3     |
| Leu             | 98.2 $\pm$ 0.3%            | n=3     | 93.2 $\pm$ 2.5%            | n=3     |
| Ile             | 99.1 $\pm$ 0.03%           | n=3     | 97.5 $\pm$ 0.9%            | n=3     |
| Arg             | 97.6 $\pm$ 0.3%            | n=3     | 92.3 $\pm$ 2.3%            | n=3     |
| Glu             | 97.4 $\pm$ 0.4%            | n=3     | 91.0 $\pm$ 2.6%            | n=3     |
| S7P             | 97.9 $\pm$ 1.1%            | n=3     | 98.4 $\pm$ 0.2%            | n=3     |
| P5P             | 97.9 $\pm$ 0.5%            | n=3     | 97.3 $\pm$ 0.7%            | n=3     |
| H6P             | 95.0 $\pm$ 2.1%            | n=3     | 96.0 $\pm$ 1.6%            | n=3     |
| AMP/ADP/<br>ATP | 98.9 $\pm$ 0.3%            | n=3     | 99.1 $\pm$ 0.2%            | n=2     |
| UMP/UDP/<br>UTP | 99.7 $\pm$ 0.3%            | n=3     | 99.2 $\pm$ 0.4%            | n=2     |

**Table S3.  $^{13}\text{C}$ -labeled fractions of protein-bound amino acids and sugar-phosphates following isotopic labeling experiment with  $^{12}\text{CO}_2$  +  $^{13}\text{C}$ -formate, related to Figure 3**  
The presented values are mean ( $\pm$ S.D.).

| Metabolite      | Isolated Clone             |         | Mixed Population           |         |
|-----------------|----------------------------|---------|----------------------------|---------|
|                 | measured % $^{13}\text{C}$ | repeats | measured % $^{13}\text{C}$ | repeats |
| Ser             | 1.0 $\pm$ 0.5%             | n=3     | n/a                        | -       |
| His             | 1.5 $\pm$ 0.1%             | n=3     | 1.3 $\pm$ 0.1%             | n=3     |
| Val             | 1.5 $\pm$ 0.1%             | n=3     | 1.3 $\pm$ 0.1%             | n=3     |
| Thr             | 1.4 $\pm$ 0.4%             | n=3     | 1.6 $\pm$ 0.1%             | n=3     |
| Pro             | 1.7 $\pm$ 0.1%             | n=3     | 1.4 $\pm$ 0.03%            | n=3     |
| Leu             | 1.4 $\pm$ 0.2%             | n=3     | 1.1 $\pm$ 0.03%            | n=3     |
| Ile             | 1.3 $\pm$ 0.1%             | n=3     | 1.2 $\pm$ 0%               | n=3     |
| Arg             | 1.8 $\pm$ 0.1%             | n=3     | 1.9 $\pm$ 0.03%            | n=3     |
| Glu             | 2.0 $\pm$ 0.1%             | n=3     | 2.1 $\pm$ 0.1%             | n=3     |
| S7P             | 1.2 $\pm$ 0.1%             | n=3     | 1.6 $\pm$ 0.1%             | n=3     |
| P5P             | 1.2 $\pm$ 0.03%            | n=3     | 1.2 $\pm$ 0.2%             | n=3     |
| H6P             | 1.3 $\pm$ 0.04%            | n=3     | 1.4 $\pm$ 0.1%             | n=3     |
| AMP/ADP/<br>ATP | 11.2 $\pm$ 0.3%            | n=3     | n/a                        |         |
| UMP/UDP/<br>UTP | 0.4 $\pm$ 0.3%             | n=3     | n/a                        |         |
